# Supplementary material
Source: PubMed Central journal article supplement (PMC2751964)
Supplement: tpc.109.068023_1.pdf [file tpc.109.068023_1.pdf]

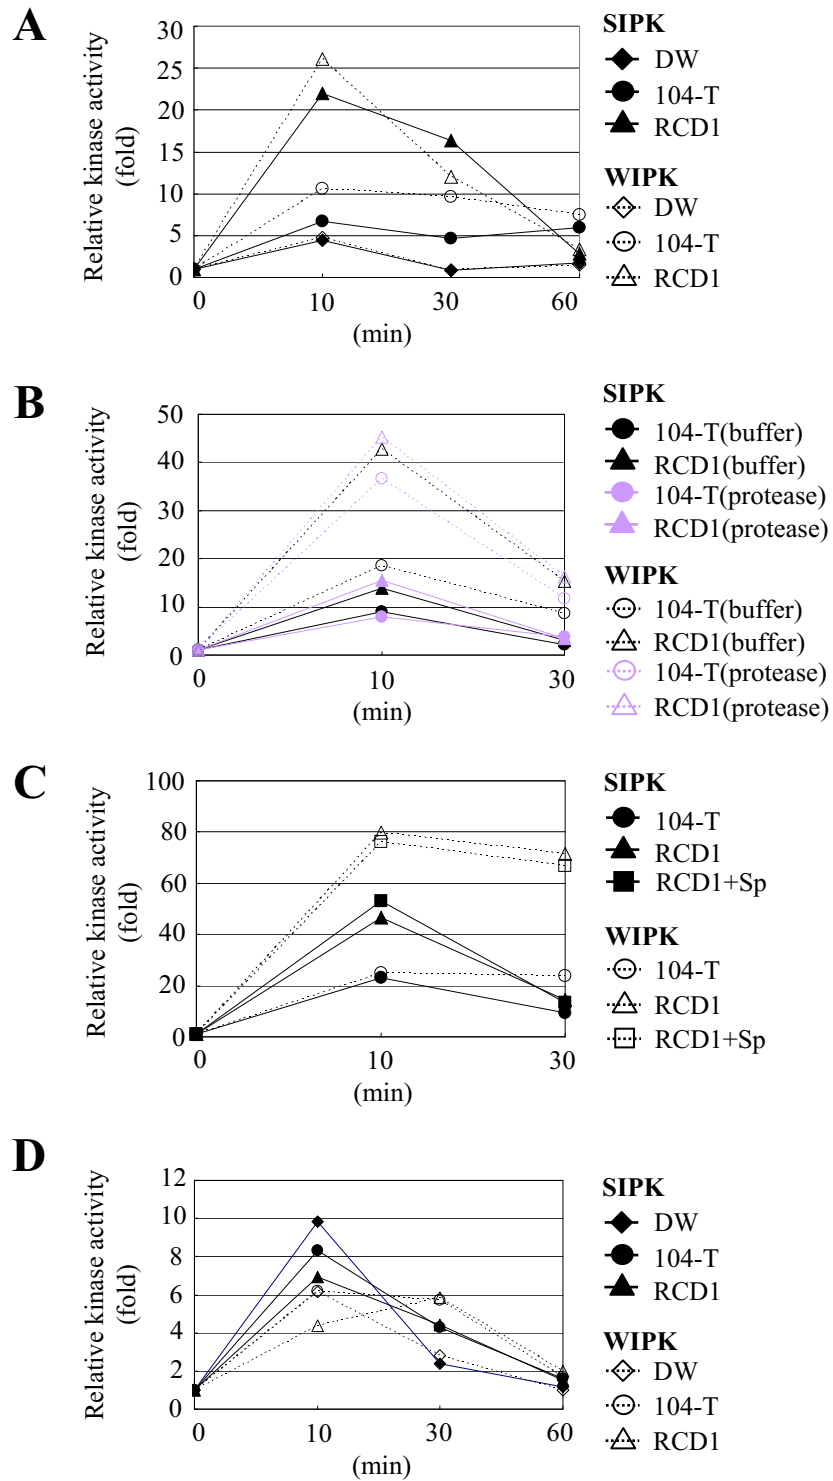

**Supplemental figure 1. Quantitative analysis of kinase activity shown in Figure 9.**

(A)-(D), quantitative data corresponding to the kinase activity gels shown in Figure 9.

**Supplemental Table 1. Primers used for RT-PCR**

| Primer Name  | Sequence                       |
|--------------|--------------------------------|
| NbMEK1-S1    | ATGAAGACGACGAAGCCATTG          |
| NbMEK1-AS1   | CTGTGGATAACATGTCTCTCATTATGCAAG |
| NbMEK2-S1    | GTCACGATATGTTTCGATCACAACG      |
| NbMEK2-AS1   | CAAGGATCCATAGTTTGTGCCAG        |
| NbSIPK-S1    | GGGCTAGCTCGTGTCACTTC           |
| NbSIPK-AS1   | GCGACTCCCTGTAAATCAGC           |
| NbWIPK-S1    | GCACCAGAGCTTTTGTGAA            |
| NbWIPK-AS1   | TCCAGATCAAAGGGGAAACA           |
| NbrbohA-S1   | ATTCTACGGAGCGTTGAACC           |
| NbrbohA-AS1  | AACGCAAATTCCTTCGAATC           |
| NbrbohB-S1   | ATCACCATCATTCCGACACA           |
| NbrbohB-AS1  | AACGCAAATTCCTTCGAATC           |
| NbRAR1-S1    | TTGTTGCAAGAAAAGCAGTCA          |
| NbRAR1-AS1   | CATGGCGATATGCTCATGAAT          |
| NbSGT1-S1    | CATTGACGACCACTTTGAGC           |
| NbSGT1-AS1   | TGTCCAGTGTAAGGGTTCAGC          |
| NbHSP90-S1   | CGCTAGACAAGATCCGCTTT           |
| NbHSP90-AS1  | CTTAAGCCTTCGCTCCTCAA           |
| NbSyp121-S1  | AGCTGACGATCAATCGGACT           |
| NbSyp121-AS1 | GCTCTTGAATTGCCTTTTGC           |
| NbEF1a-S1    | AGCTGACTGTGCTGTCCTGA           |
| NbEF1a-AS1   | GGGGTGCATCTCAACAGATT           |
